# Supplementary material for: Longitudinal Characterization of the Gut Bacterial and Fungal Communities in Yaks
Source: MDPI journal article supplement (doi:10.3390/jof7070559), 2021-07-14
Supplement: s1 [file s1]

**Table S1.** The information of the yaks.

| <b>Sample</b> | <b>Gender</b> | <b>Body weight (Kg)</b> |
|---------------|---------------|-------------------------|
| Y1            | Male          | 92.7                    |
| Y2            | Male          | 86.1                    |
| Y3            | Male          | 89.3                    |
| Y4            | Female        | 78.6                    |
| Y5            | Female        | 90.5                    |
| Y6            | Female        | 82.8                    |
| A1            | Male          | 424.6                   |
| A2            | Male          | 402.4                   |
| A3            | Male          | 443.4                   |
| A4            | Female        | 398.7                   |
| A5            | Female        | 401.9                   |
| A6            | Female        | 387.6                   |
| O1            | Male          | 294.5                   |
| O2            | Male          | 321.9                   |
| O3            | Male          | 301.1                   |
| O4            | Female        | 288.4                   |
| O5            | Female        | 310.2                   |
| O6            | Female        | 292.2                   |

**Table S2.** Statistics of samples bacterial sequenced data.

| <b>Sample ID</b> | <b>Raw Reads</b> | <b>Clean Reads</b> | <b>Effective Reads</b> | <b>Effective(%)</b> |
|------------------|------------------|--------------------|------------------------|---------------------|
| A1               | 80,074           | 79,163             | 76,252                 | 95.23               |
| A2               | 79,908           | 79,056             | 75,577                 | 94.58               |
| A3               | 80,191           | 79,236             | 75,292                 | 93.89               |
| A4               | 79,857           | 78,929             | 75,069                 | 94                  |
| A5               | 71,505           | 70,658             | 67,553                 | 94.47               |
| A6               | 79,911           | 78,956             | 75,816                 | 94.88               |
| Y1               | 79,949           | 78,920             | 76,284                 | 95.42               |
| Y2               | 80,118           | 79,165             | 76,715                 | 95.75               |
| Y3               | 79,979           | 78,971             | 76,268                 | 95.36               |
| Y4               | 79,862           | 78,977             | 75,914                 | 95.06               |
| Y5               | 79,977           | 79,058             | 76,198                 | 95.27               |
| Y6               | 79,981           | 79,129             | 75,870                 | 94.86               |
| O1               | 80,022           | 79,073             | 76,491                 | 95.59               |
| O2               | 58,920           | 58,249             | 55,850                 | 94.79               |
| O3               | 78,607           | 77,668             | 75,334                 | 95.84               |
| O4               | 80,120           | 79,188             | 76,057                 | 94.93               |
| O5               | 80,261           | 79,420             | 77,644                 | 96.74               |
| O6               | 80,036           | 79,219             | 76,254                 | 95.27               |

**Table S3.** Statistics of samples fungal sequenced data.

| Sample ID | Raw Reads | Clean Reads | Effective Reads | Effective(%) |
|-----------|-----------|-------------|-----------------|--------------|
| A1        | 73,804    | 71,790      | 71,472          | 96.84        |
| A2        | 77,531    | 75,652      | 75,318          | 97.15        |
| A3        | 65,032    | 63,258      | 63,111          | 97.05        |
| A4        | 80,002    | 78,205      | 77,872          | 97.34        |
| A5        | 66,075    | 64,339      | 63,540          | 96.16        |
| A6        | 80,042    | 78,252      | 77,969          | 97.41        |
| Y1        | 80,043    | 78,918      | 78,873          | 98.54        |
| Y2        | 79,575    | 78,360      | 77,704          | 97.65        |
| Y3        | 79,868    | 78,643      | 78,432          | 98.2         |
| Y4        | 79,971    | 79,223      | 79,217          | 99.06        |
| Y5        | 79,846    | 79,194      | 79,191          | 99.18        |
| Y6        | 79,863    | 79,139      | 78,553          | 98.36        |
| O1        | 80,169    | 78,725      | 78,249          | 97.61        |
| O2        | 79,980    | 78,586      | 77,679          | 97.12        |
| O3        | 80,000    | 78,546      | 77,252          | 96.56        |
| O4        | 80,085    | 78,742      | 78,635          | 98.19        |
| O5        | 78,435    | 77,178      | 77,033          | 98.21        |
| O6        | 79,775    | 78,451      | 77,297          | 96.89        |

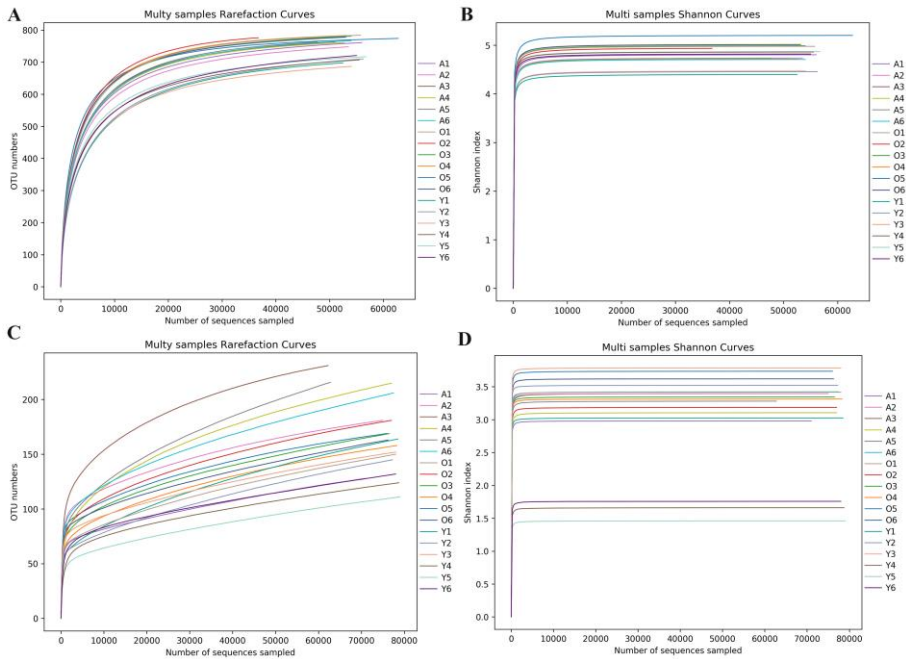

**Figure S1.** Analysis of samples feasibility in all groups. A, B represented Rarefaction and Shannon curves in bacterial samples, respectively. C, D represented Rarefaction and Shannon curves in fungal samples, respectively.
